# Supplementary material for: Preparation of multifunctional ceramic foams for sound absorption, waterproofing, and antibacterial applications
Source: Royal Society of Chemistry journal article supplement (doi:10.1039/d3ra06675d), 2024-01-01
Supplement: d3ra06675d1.pdf [file d3ra06675d1.pdf]

## Supporting Information

### **Preparation of multifunctional ceramic foams for sound-absorbing, waterproof, and antibacterial applications**

Xizhi Zhang,<sup>a</sup> Xiaozhong Chen,<sup>b</sup> Wenchao Min,<sup>c</sup> Guowei Liang,<sup>d</sup> Wei Zhang,<sup>a</sup>

Shuheng Yao<sup>a</sup> and Ximing Zhong<sup>\*b</sup>

<sup>a</sup>Faculty of Humanities and Arts, Macau University of Science and Technology, Taipa, Macau 999078, China.

<sup>b</sup>School of Chemistry and Chemical Engineering, Zhongkai University of Agriculture and Engineering, Guangzhou, Guangdong 510225, China.

<sup>c</sup>HeXiangNing College of Art and Design, Zhongkai University of Agriculture and Engineering, Guangzhou, Guangdong 510225, China.

<sup>d</sup>School of Materials Science and Engineering, South China University of Technology, Guangzhou, Guangdong 510641, China.

\*Corresponding authors.

\* Ximing Zhong, E-mail: zhongximing2006@126.com

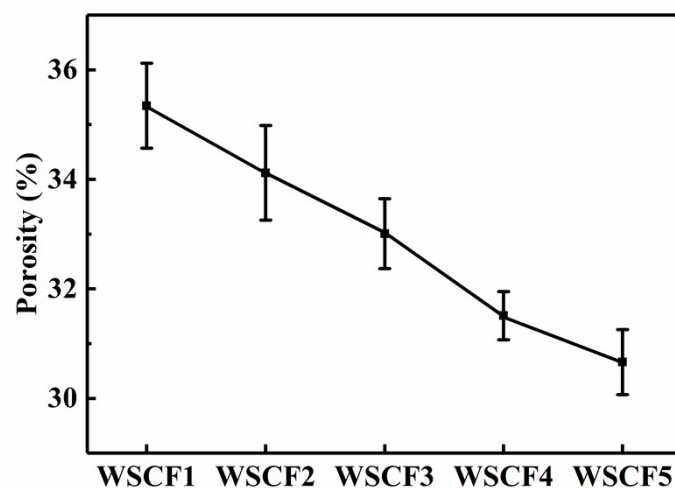

**Fig. S1** The porosity of the different ceramic foams.

**Table S1** The antibacterial rates (*E*) of different ceramic foams.

| Samples | Average <i>E</i> for <i>E. coli</i> | Average <i>E</i> for <i>S. aureus</i> |
|---------|-------------------------------------|---------------------------------------|
| Control | 0                                   | 0                                     |
| WSCF1   | 95.53%                              | 95.50%                                |
| WSCF2   | 95.79%                              | 96.75%                                |
| WSCF3   | 98.29%                              | 97.25%                                |
| WSCF4   | 99.74%                              | 99.75%                                |
| WSCF5   | 100%                                | 99.75%                                |
